# Supplementary material for: Sexualized drug use among men who have sex with men in Madrid and Barcelona: The gateway to new drug use?
Source: Frontiers journal article supplement (doi:10.3389/fpubh.2022.997730), 2022-11-15
Supplement: Data_Sheet_3.PDF [file Data_Sheet_3.PDF]

**ANNEX: Table 2.** Wording of the different psychoactive drugs included in the analysis.

| Psychoactive drug | Wording in the questionnaire                                                                                                                                            |
|-------------------|-------------------------------------------------------------------------------------------------------------------------------------------------------------------------|
| Viagra            | Viagra®, Cialis®, Levitra® or other erection aids                                                                                                                       |
| Poppers           | Poppers                                                                                                                                                                 |
| Cannabis          | Cannabis or synthetic cannabinoids (marijuana, hashish, chocolate, joints, grass, synthetic marijuana, spice, K2)                                                       |
| Amphetamine       | Amphetamine (speed)                                                                                                                                                     |
| Cocaine           | Powdered or crack cocaine (theme, lighthouse, base, basuco, etc.)                                                                                                       |
| Ecstasy           | Ecstasy or MDMA in its pill form (pills, lollipops) or in its crystalline or powder form (M, crystal)                                                                   |
| Ketamine          | Ketamine (K, keta, kei)                                                                                                                                                 |
| GHB/GBL           | GHB/GBL (G, canister, liquid ecstasy)                                                                                                                                   |
| Methamphetamine   | Methamphetamine (bathtub, crystal meth, T)                                                                                                                              |
| Mephedrone        | Mephedrone (mefe) or other different synthetic stimulants (bath salts, methoxetamine/MXE, methylone/3MMC, methylethcathinone/4MEC, fluoroamphetamine/light ecstasy/4FA) |

**ANNEX: Table 3.** Summary of terms used and drugs included in each term.

| Terms used                         | Drugs included                                    |
|------------------------------------|---------------------------------------------------|
| Chemsex drugs,<br>4-chems          | Methamphetamine, Mephedrone, GHB/GBL and Ketamine |
| 3-chems                            | Methamphetamine, Mephedrone and GHB/GBL           |
| 2-chems                            | Methamphetamine and Mephedrone                    |
| Party drugs,<br>Recreational drugs | Amphetamine, Cocaine and Ecstasy                  |
